# Supplementary material
Source: PubMed Central journal article supplement (PMC9886742)
Supplement: 11357_2022_663_MOESM1_ESM.pdf [file 11357_2022_663_MOESM1_ESM.pdf]

**Figure S1**

**Europe:** 20 studies:

- United Kingdom (4)\*
- Germany (3)
- Italy (2)
- France (2)
- Finland (2)
- Sweden (2)
- Norway; Spain; Ireland; Romania; Switzerland (1)

**Asia:** 40 studies:

- Japan (33)
- Taiwan (3)
- China (2)
- Thailand; Saudi Arabia (1)

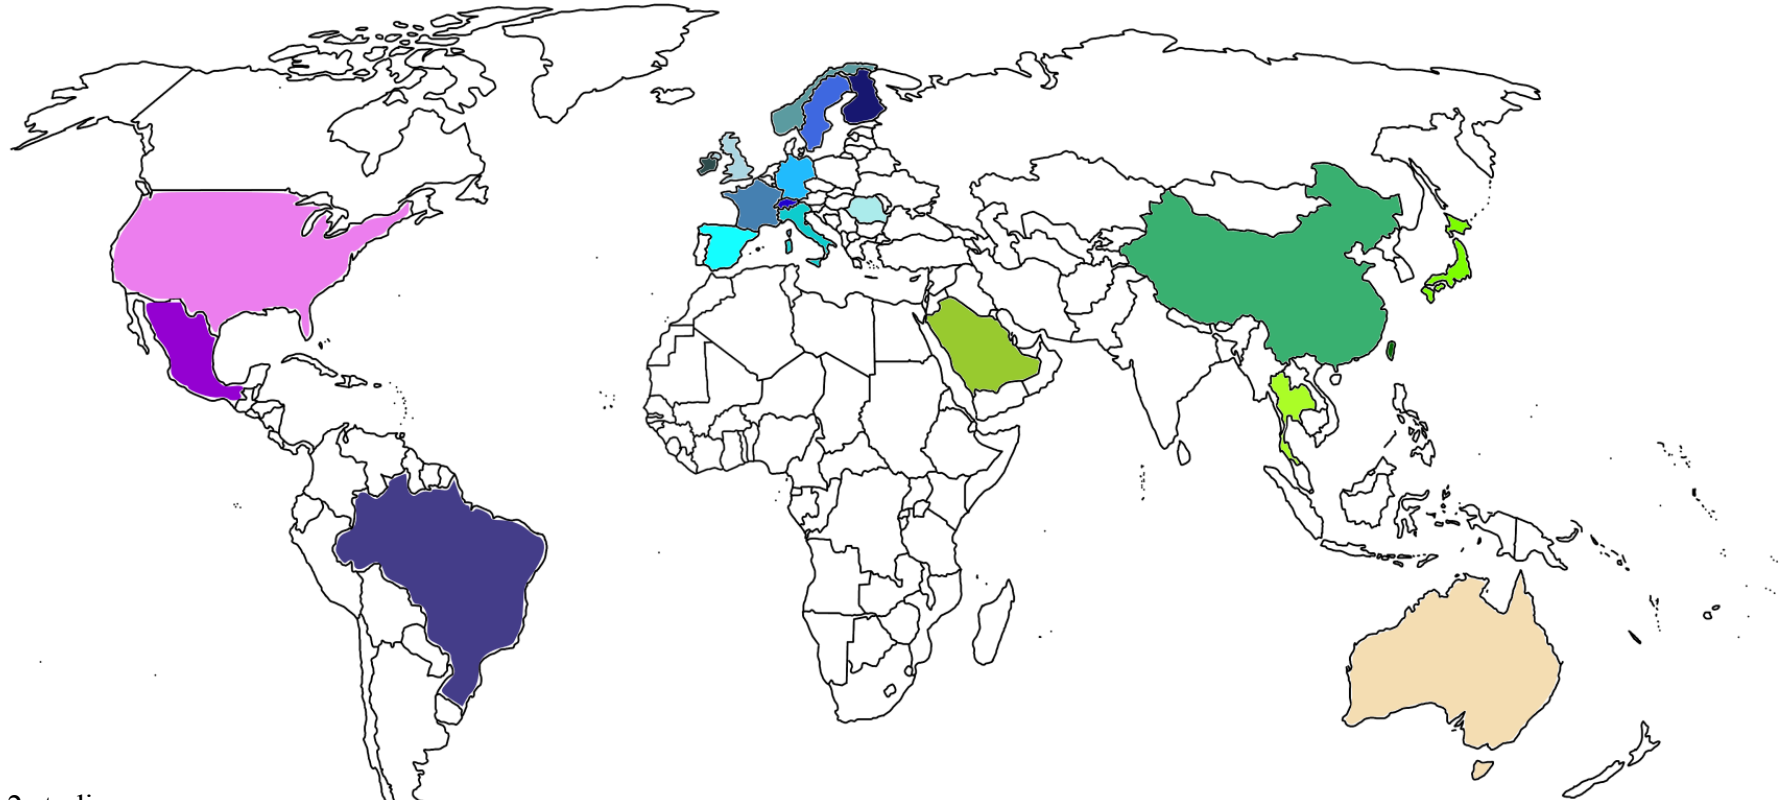

**North America:** 2 studies:

- Mexico (3)
- USA (2)\*

**South America:** 4 studies:

- Brazil (4)

**Oceania:** 1 study

- Australia (1)

\* 2 studies (Europe - North America)
